# Supplementary material for: Low-carbohydrate diets for type 1 diabetes mellitus: A systematic review
Source: PLOS journal article supplement (doi:10.1371/journal.pone.0194987), 2018-03-29
Supplement: S6 (10.1371/journal.pone.0194987.s006) [file journal.pone.0194987.s006]

S5 Table: Reported Dietary Intake Data of Participants in Intervention and Comparator Groups of Included Studies

| Study ID                         | Class <sup>a</sup> | Context/setting                                                                                                                                                                                                                                                                | Intervention <sup>b</sup>                                                                           | Comparator <sup>b</sup>                                                                             |
|----------------------------------|--------------------|--------------------------------------------------------------------------------------------------------------------------------------------------------------------------------------------------------------------------------------------------------------------------------|-----------------------------------------------------------------------------------------------------|-----------------------------------------------------------------------------------------------------|
| Anderson 1991 [20]               | FLCD               | Inpatients. Control (usual diet) for 7 d; 1 <sup>st</sup> experimental diet for 28 d; control for 28 d (washout); 2 <sup>nd</sup> experimental diet for 28 d.                                                                                                                  | <i>n</i> 10 (/10)<br>C: 221 ± 35 g (~39%)<br>P: 113 ± 19 g<br>F: 101 ± 18 g<br>E: 2261 ± 370 kcal   | <i>n</i> 10 (/10)<br>C: 363 ± 76 g (~68%)<br>P: 106 ± 20 g<br>F: 24 ± 5 g<br>E: 2124 ± 418 kcal     |
| Chantelau 1982 [21]              | FLCD               | Prior to intervention (i.e. baseline/comparator), patients had been educated on American Diabetes Association “conventional” diabetes diet, whereby 50% of total energy intake is from carbohydrate.                                                                           | <i>n</i> 10<br>C: 156 ± 46 g (34 ± 5%)<br>P: 15 ± 2%<br>F: 51 ± 5%<br>E: 1300 – 3800 kcal           | Baseline                                                                                            |
| Knight 2016 [23]                 | FLCD               | DAFNE program at Queensland Diabetes Centre. Prior to intervention (i.e., baseline/comparator), “Participants often reported management that was based on a prescribed carbohydrate portion meal plan, and many were advised to consume carbohydrate at all meals and snacks.” | <i>n</i> 46<br>C: 162 (143-204) g (42 ± 7%)<br>P: 21 ± 4%<br>F: 34 ± 7%<br>E: 1592 (1378-1940) kcal | <i>n</i> 46<br>C: 198 (163-238) g (42 ± 7%)<br>P: 21 ± 3%<br>F: 32 ± 7%<br>E: 1799 (1521-1931) kcal |
| Bernstein 1980 <sup>c</sup> [26] | TLCD               | Total elimination of simple sugars and fruits. Carbohydrate taken as vegetables, salad dressing or associated with high- protein packaged foods. Three main meals, without snacks.                                                                                             | <i>n</i> 1<br>C: 15%<br>P: ≥45%<br>F: ≤40%                                                          | Baseline                                                                                            |
| Ireland 1992 [22]                | TLCD               | Royal Melbourne Hospital outpatients. ‘Present diet’ formed the control diet whereby “...most had been attempting to increase their intake of complex carbohydrate and dietary fibre.”                                                                                         | <i>n</i> 8<br>C: ~87 g (22 ± 2%)<br>P: 62 ± 1%<br>F: 16 ± 1%<br>E: 1617 ± 109 kcal                  | <i>n</i> 8<br>C: ~188 g (46 ± 1%)<br>P: 19 ± 1%<br>F: 33 ± 2%<br>E: 1627 ± 126 kcal                 |
| Krebs 2016 [10]                  | TLCD               | All those referred to carbohydrate counting education to the Endocrine, Diabetes and Research Centre were approached to participate.                                                                                                                                           | <i>n</i> 5 (/10)<br>C: 103 ± 22 g (~30%)<br>P: 76 ± 16 g<br>F: 69 ± 13 g<br>E: 1391 ± 159 kcal      | <i>n</i> 5 (/10)<br>C: 203 ± 92 g (~44%)<br>P: 85 ± 42 g<br>F: 77 ± 15 g<br>E: 1854 ± 551 kcal      |

S5 Table: Reported Dietary Intake Data of Participants in Intervention and Comparator Groups of Included Studies

|                                |       |                                                                                                                                                                                                                |                                                          |          |
|--------------------------------|-------|----------------------------------------------------------------------------------------------------------------------------------------------------------------------------------------------------------------|----------------------------------------------------------|----------|
| Nielsen 2012 <sup>c</sup> [8]  | TLCD  | All individuals attending the education course from the start of 2004 to 2006 and adhering to it for at least the first 4 weeks are reported.                                                                  | <i>n</i> 48<br>C: ≤ 75 g (15-20%)<br>P: 30%<br>F: 50-55% | Baseline |
| O'Neill 2003 <sup>c</sup> [24] | VLCKD | Multi-component program that patients followed on their own. The charts selected for this study were based on assessment of the patients' ability to comply with the regimen.                                  | <i>n</i> 10<br>C: 30 g                                   | Baseline |
| Vernon 2003 <sup>c</sup> [25]  | VLCKD | Aim of initial diet was to produce detectable urinary ketones and achieve glycemic control. Maintenance diet individually determined by the highest level of carbohydrate where there were no urinary ketones. | <i>n</i> 1<br>C: 20-50 g                                 | Baseline |

Abbreviations: g (grams), d (day/s), *n* (sample size that completed intervention or control), C (total daily dietary carbohydrate), P (total daily dietary protein), F (total daily dietary fat), E (total daily energy intake), % (percent of total energy intake), DAFNE (Dose Adjustment for Normal Eating), baseline (dietary intake of participants before the intervention; data not reported in study).

a: Classification of intervention: False low-carbohydrate diet (FLCD) includes daily dietary carbohydrate above 130 g/d or 26% total energy intake; true low-carbohydrate diet (TLCD) includes daily dietary carbohydrate of 50-130 g/d; very low-carbohydrate ketogenic diet (VLCKD) includes daily dietary carbohydrate below 50 g/d.

b: Mean daily macronutrient and energy intakes for each group reported as  $\bar{x} \pm SD$  or  $\bar{x}$  (range) (to nearest whole unit). ~ indicates that value was calculated using Atwater factors and not taken from study (i.e., not reported).

c: Dietary intake of participants was not reported. Macronutrient and energy values are given as per the intervention prescription of the study.
